# Supplementary material for: Students’ Conception of Genetic Phenomena and Its Effect on Their Ability to Understand the Underlying Mechanism
Source: Atypon-hosted journal article supplement (doi:10.1187/cbe.18-01-0014), 2018-06-28

# Supplemental Material

*CBE—Life Sciences Education*

Haskel-Ittah and Yarden

## Supplemental materials

### Representative concept maps.

Student A had a non-mechanistic conception of the relationships between genes and traits both in pre-test and post-test (marked with \*). This student also linked DNA to protein in an incorrect manner in the pretest and the posttest (marked with \*\*). Student B had a mechanistic conception of the relationships between genes and traits already in the pre-test (marked with #). This student linked DNA to protein in an incorrect manner in the pretest, this was changed in the posttest (marked with ##).

## Student A | Pre-test

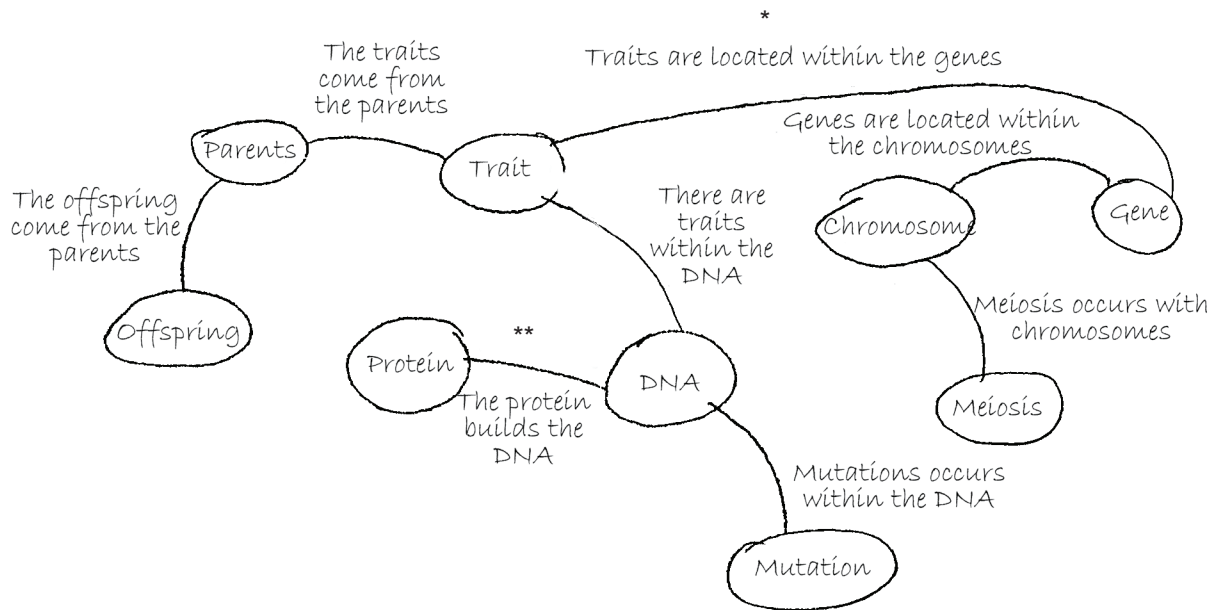

## Student A | Post-test

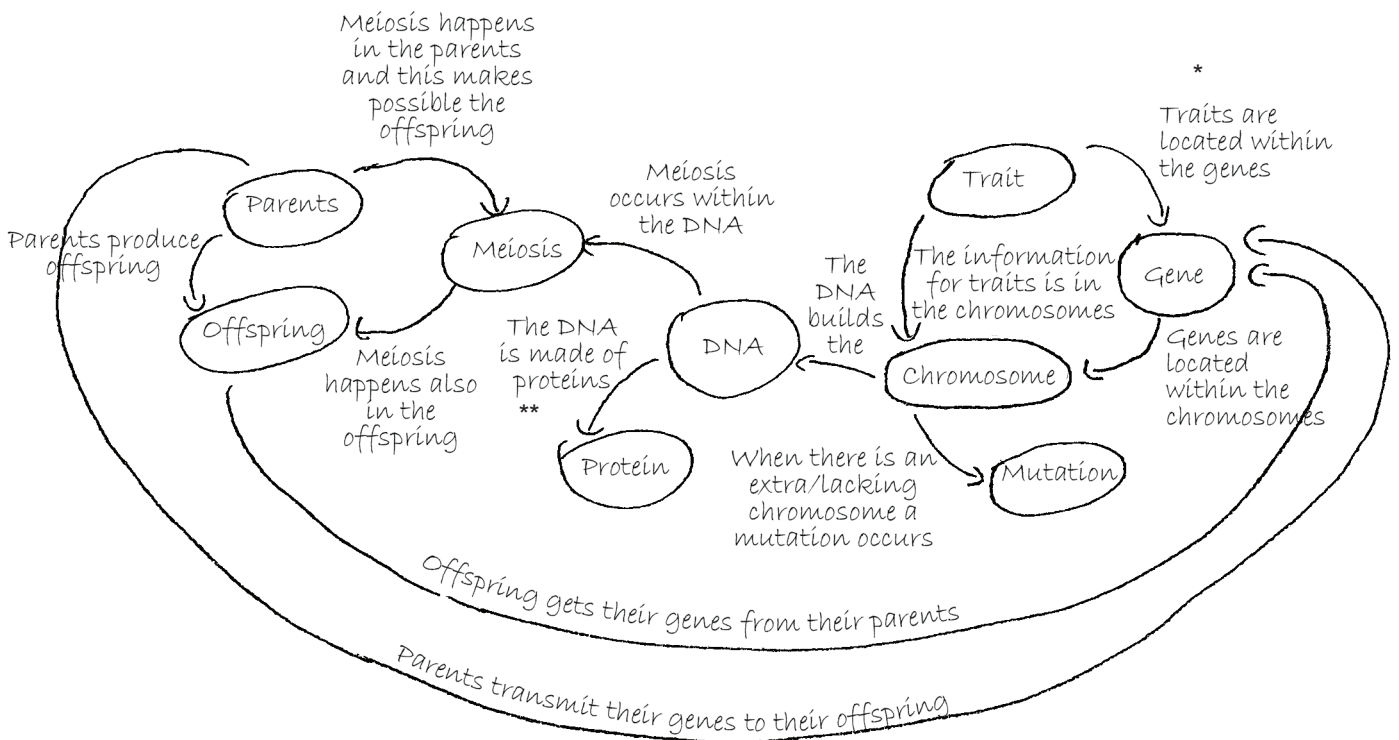

## Student B | Pre-test

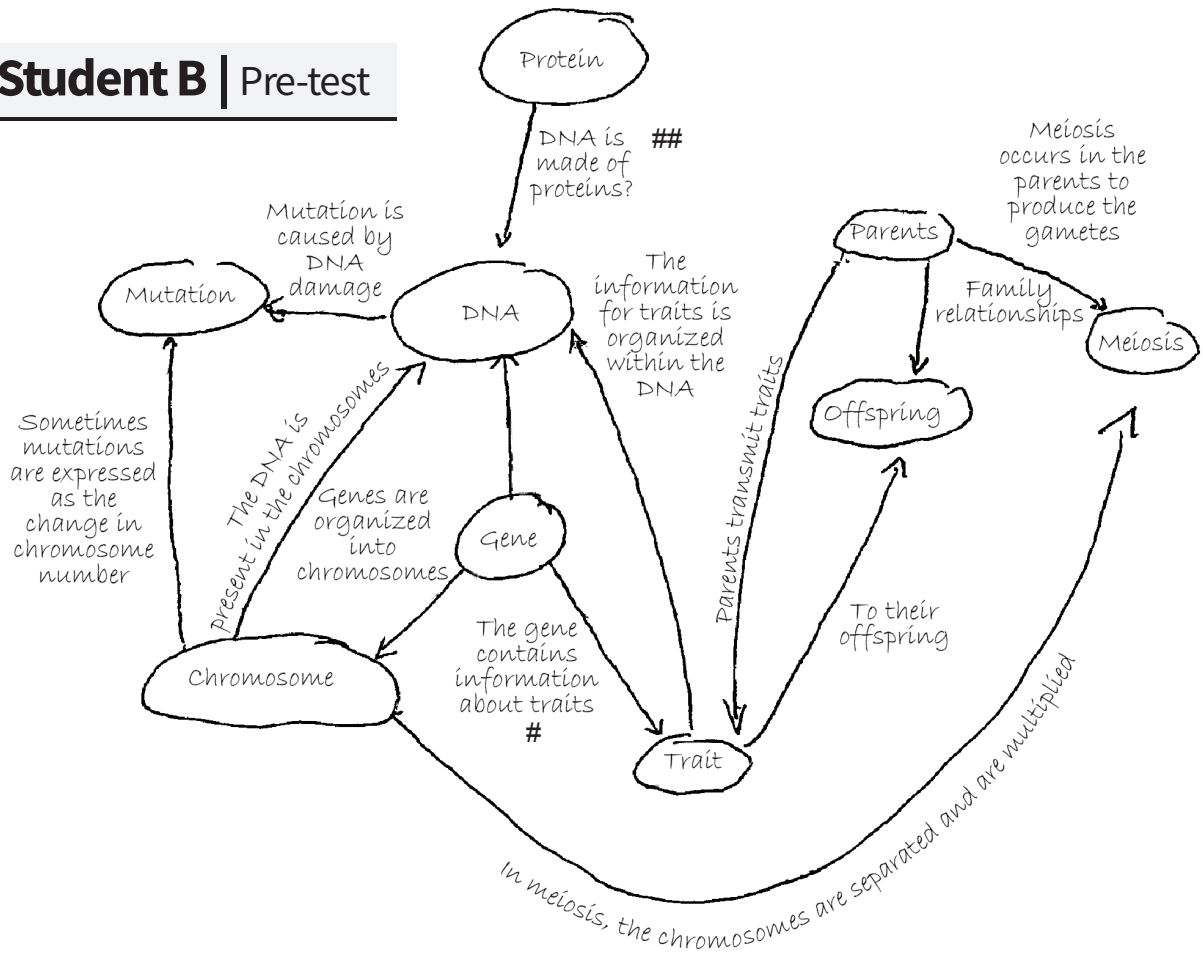

## Student B | Post-test

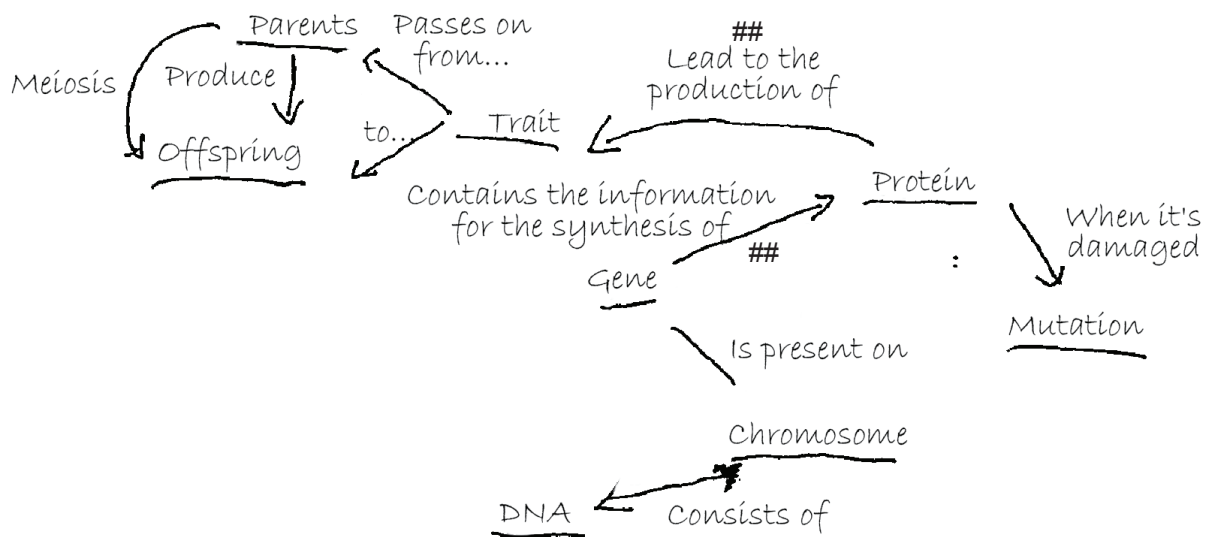

Supplement: combinedsupmats.pdf [file combinedsupmats.pdf]
